# Supplementary material for: Can Feeding a Millet-Based Diet Improve the Growth of Children?—A Systematic Review and Meta-Analysis
Source: MDPI journal article supplement (doi:10.3390/nu14010225), 2022-01-05
Supplement: s1 [file s1]

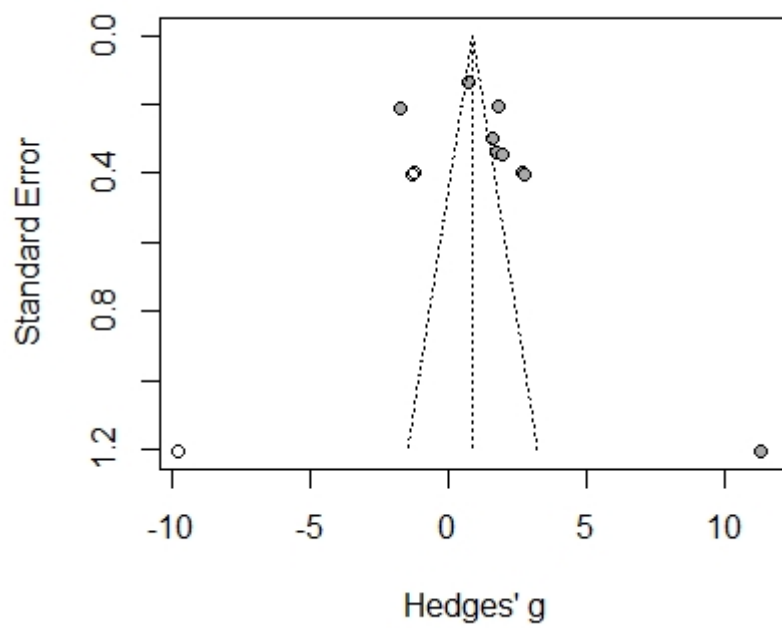

**Figure S1. Funnel plot for the studies conducted to test the effect of millet vs regular rice based meals on height**

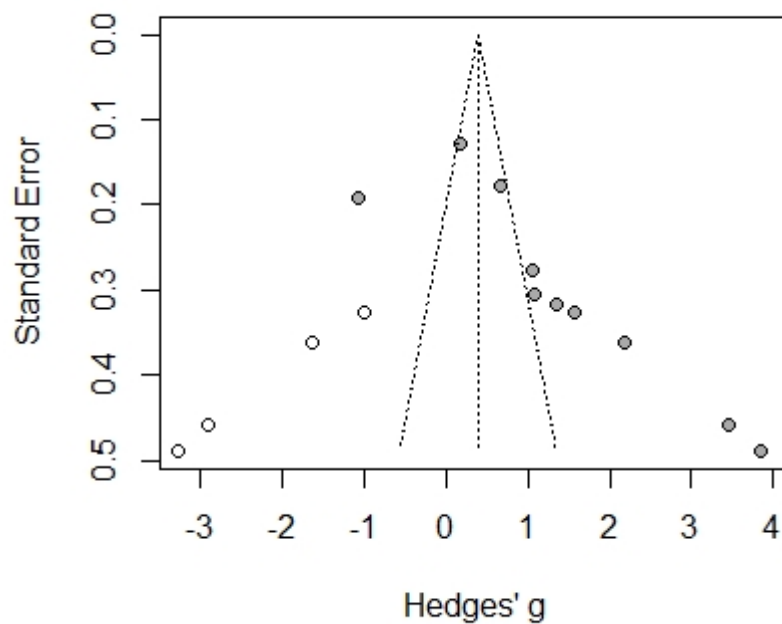

**Figure S2. Funnel plot for the studies conducted to test the effect of millet vs regular rice based meals on weight**

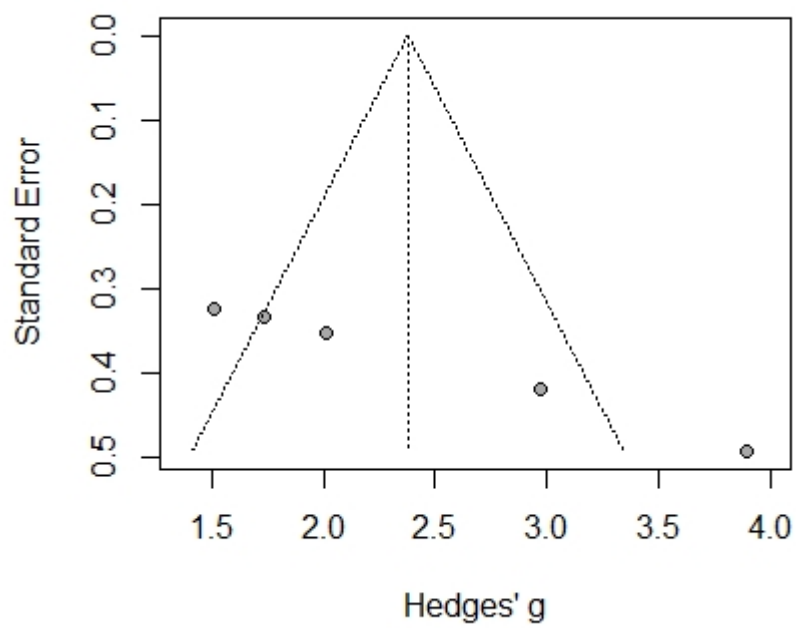

**Figure S3. Funnel plot for the studies conducted to test the effect of millet vs regular rice based meals on MUAC**

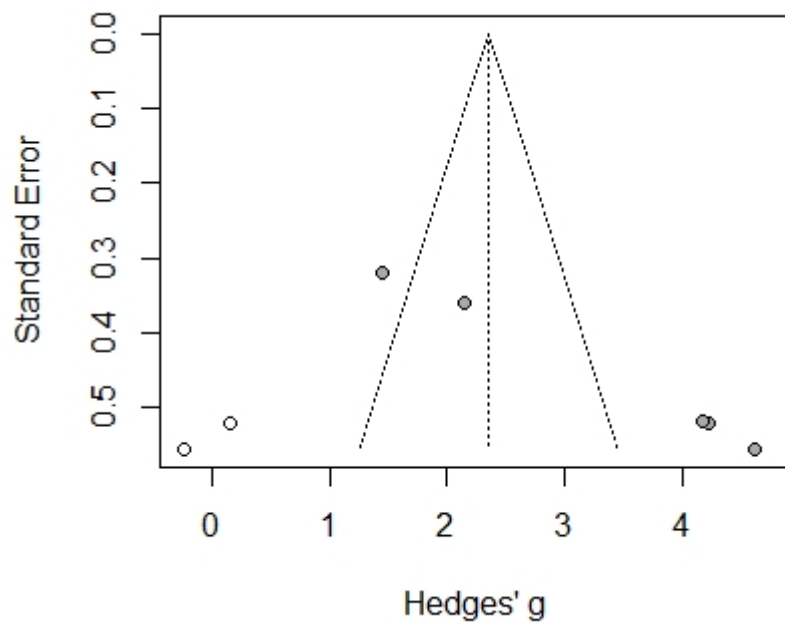

**Figure S4. Funnel plot for the studies conducted to test the effect of millet vs regular rice based meals on chest circumference**

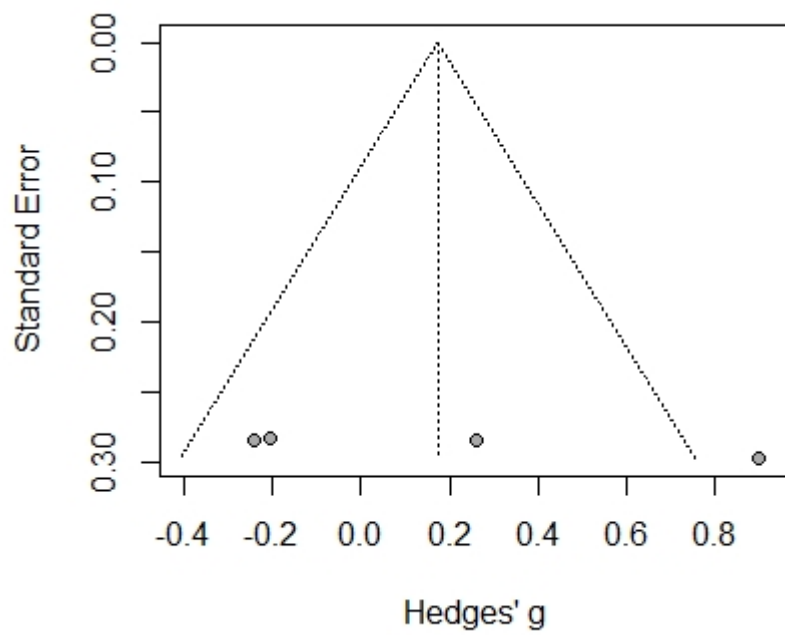

**Figure S5. Funnel plot for the studies conducted to test the effect of enhanced finger millet vs enhance rice based meals on height**

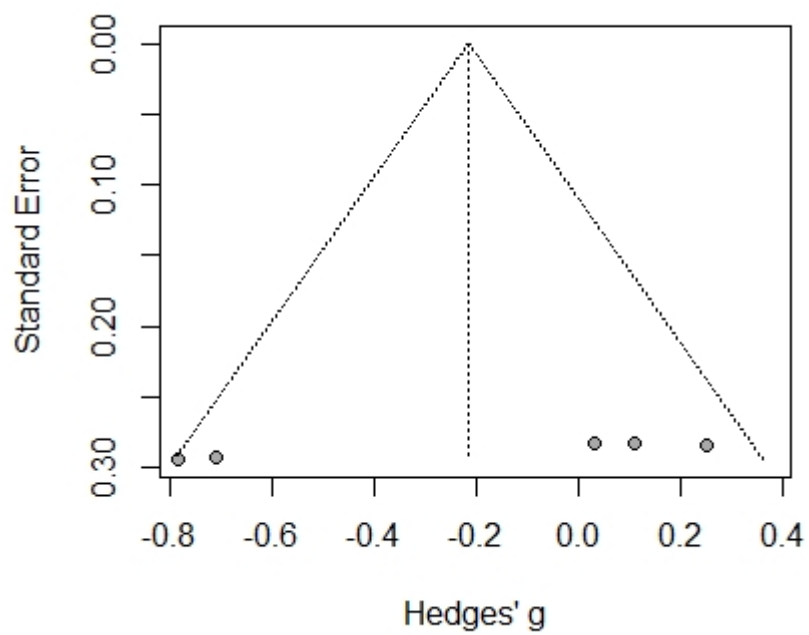

**Figure S6. Funnel plot for the studies conducted to test the effect of enhanced finger millet vs enhanced rice based meals on weight**

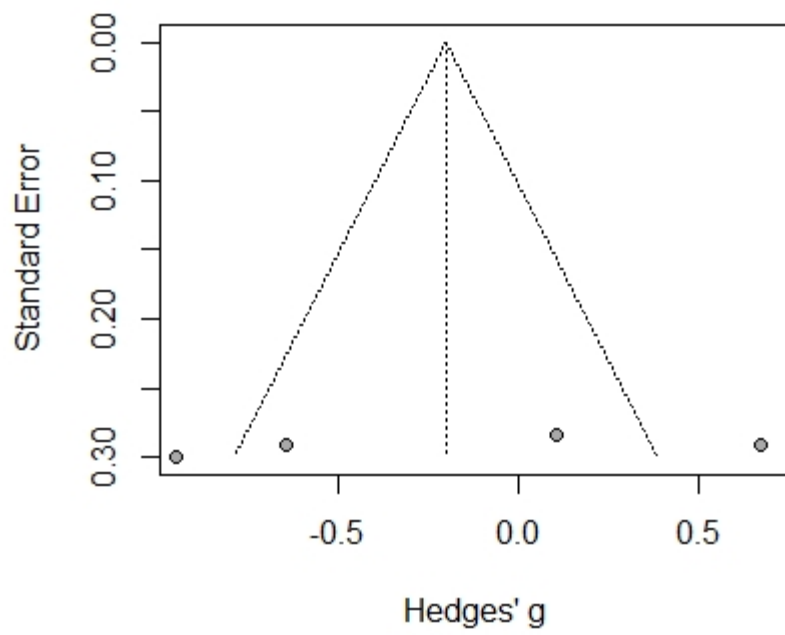

**Figure S7. Funnel plot for the studies conducted to test the effect of enhanced finger millet vs enhanced rice based meals on MUAC**

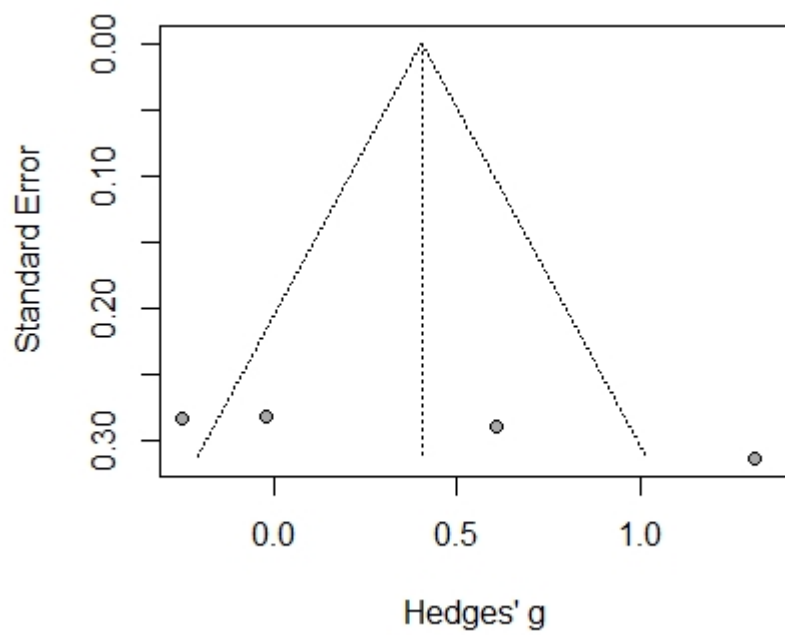

**Figure S8. Funnel plot for the studies conducted to test the effect of enhanced finger millet vs modified rice based meals on chest circumference**

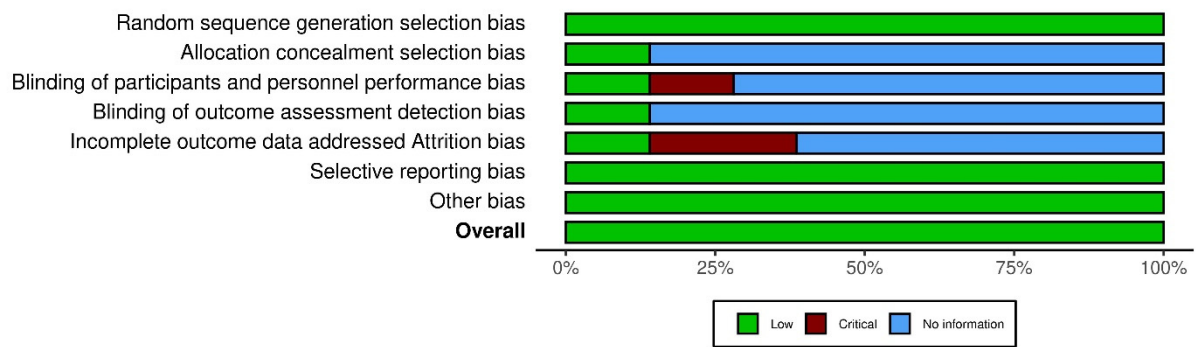

**Figure S9. Risk of bias assessment**
